# Supplementary material
Source: Research Square preprint supplement (doi:10.21203/rs.3.rs-9184169/v1)
Supplement: Supplementary file 1 [file 06fbe5f4cc8c0db6a7affdc1.docx]

**Table S1** The biocontrol efficacy of *A. bicaudatus* against Fusarium wilt disease of tomato

| Treatments | Disease Severity Scale (N=5) | Wilt Index | Disease Incidence (%) |
| --- | --- | --- | --- |
| Control | 0, 0, 0, 0, 0 | 0 | 0% |
| A23 | 0, 0, 0, 0, 0 | 0 | 0% |
| Fusarium | 5, 5, 5, 5, 5 | 5 | 100% |
| Fusarium + A23 | 0, 0, 1, 1, 0 | 0.4 | 40% |

Note: N=5, total number of tomato plants.
