# Supplementary material
Source: Research Square preprint supplement (doi:10.21203/rs.3.rs-9184169/v1)
Supplement: Supplementary file 2 [file fd6501cacd7c8d44fb759f68.docx]

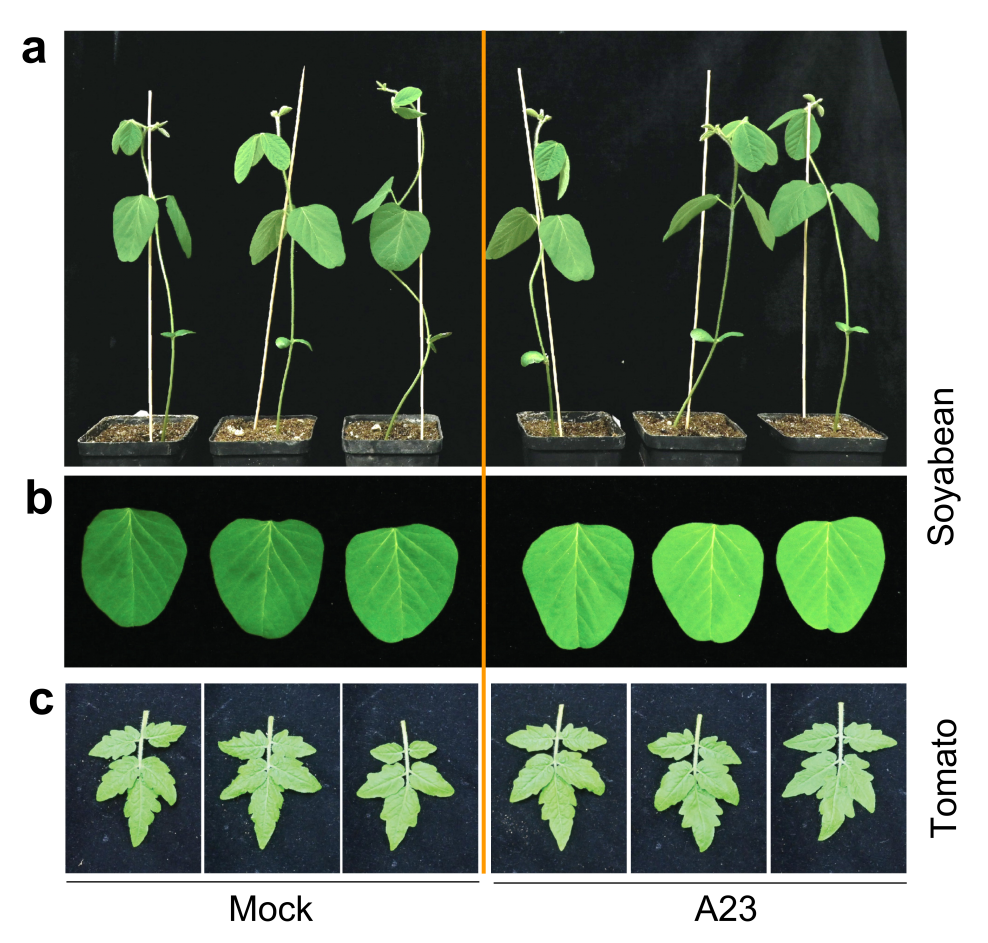


**Figure S1** *A. bicaudatus* A23 is non-pathogenic to plants. **a** Inoculation of A23 on 2-week-old soybean leaves compared with mock-treated control. **b** The symptom of soybean leaves after inoculation. **c** The symptom of tomato leaves after inoculation.
